# Supplementary material
Source: publisher figshare collection journal article supplement (https://scielo.figshare.com/articles/dataset/_/6179477)
Supplement: Supplementary file 1 [file Table_1.xls]

## Sheet: Table_1
<b></b>		<b>US patterns</b>
Patients characteristics		Hyperechoic thickening with AS (n:32)	Isoechoic thickening (n:6)	Hyperechoic thickening without AS (n:3)	P
Age (years), median (range)		55.5 (45-63)	54.3 (29-68)	54.5 (48-61)	NS
Plaques size (mm), median (range)		7.9 (3-13)	8 (5-12)	7.6 (6-10)	NS
BMI (kg/m<sup>2</sup>), mean±SD		25.7±4.3	24.7±3.9	25.4±4.9	NS
<strong>Tobacco, n (%)</strong>					NS
	Never	19 (59.4)	4 (66.7)	2 (66.7)
	Former	5(15.6)	0	1 (33.3)
	Current	8 (25)	2(33.3)	0
Hypertension, n (%)		12 (37.5)	3 (50)	1 (33.3)	<0.001
Cardiovascular diseases, n (%)		7 (21.9)	0	0	<0.001
Diabetes, n (%)		4 (12.5)	0	0	<0.001
Hypercholesterolemia, n (%)		9 (28.1)	3 (50)	2 (66.7)	<0.002
<strong>Clinical symptoms, n (%)</strong>					<0.001
	Erectile dysfunction	26 (81.3)	2 (33.3)	2 (66.7)
	Penile pain	4 (12.5)	4 (66.7)	0
	Penile length loss	2 (6.2)	0	1 (33.3)
<strong>Penile CDU findings, n (%)</strong>					<0.001
	Mean PSV > 25 cm/sec	14 (43.8)	4 (66.7)	3 (100)
	Mean PSV < 25 cm/sec	18 (56.2)	2 (33.3)	0
	Mean EDV > 5 cm/sec	2 (6.2)	0	0
	Mean EDV < 5 cm/sec	30 (93.8)	6 (100)	3 (100)
<strong>Treatments for PD, n (%)</strong>					<0.001
	Phosphodiesterase-5 inhibitor	14 (43.8)	0	0
	Vitamin E	2 (6.2)	4 (66.7)	3 (100)
	Pentoxyfilline	2 (6.2)	0	0
	I.I. with steroids	6 (18.8)	0	0
	I.I. with verapamil	8 (25)	2 (33.3)	0
